# Supplementary material
Source: PubMed Central journal article supplement (PMC2915740)
Supplement: supp_M110.103119_supplementary-final.pdf [file supp_M110.103119_supplementary-final.pdf]

Supplementary Figures

Figure S1

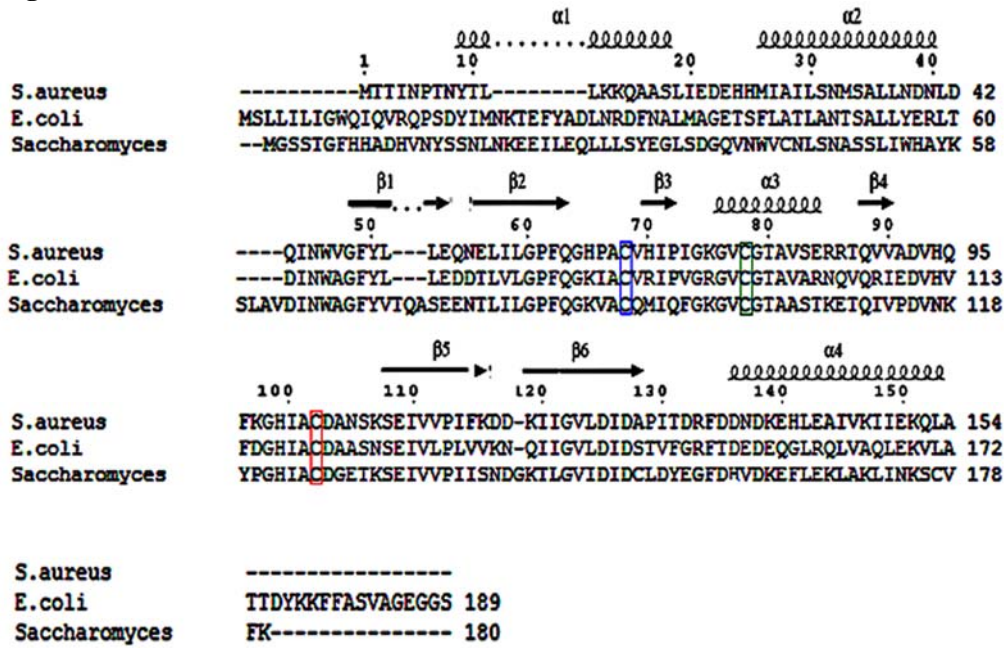

**Figure S1.** Multiple sequence alignment of fRMsr. Sequences of *E. coli*, *S. cerevisiae* and *S. aureus* fRMsr were aligned with BioEdit (<http://www.mbio.ncsu.edu/BioEdit/bioedit.html>). Catalytic Cys-102 is highlighted in red, resolving Cys-68 in blue and conserved Cys-78 in green. Secondary  $\alpha$ -helices and  $\beta$ -strands determined from *S. aureus* fRMsr are indicated.

**Figure S2**

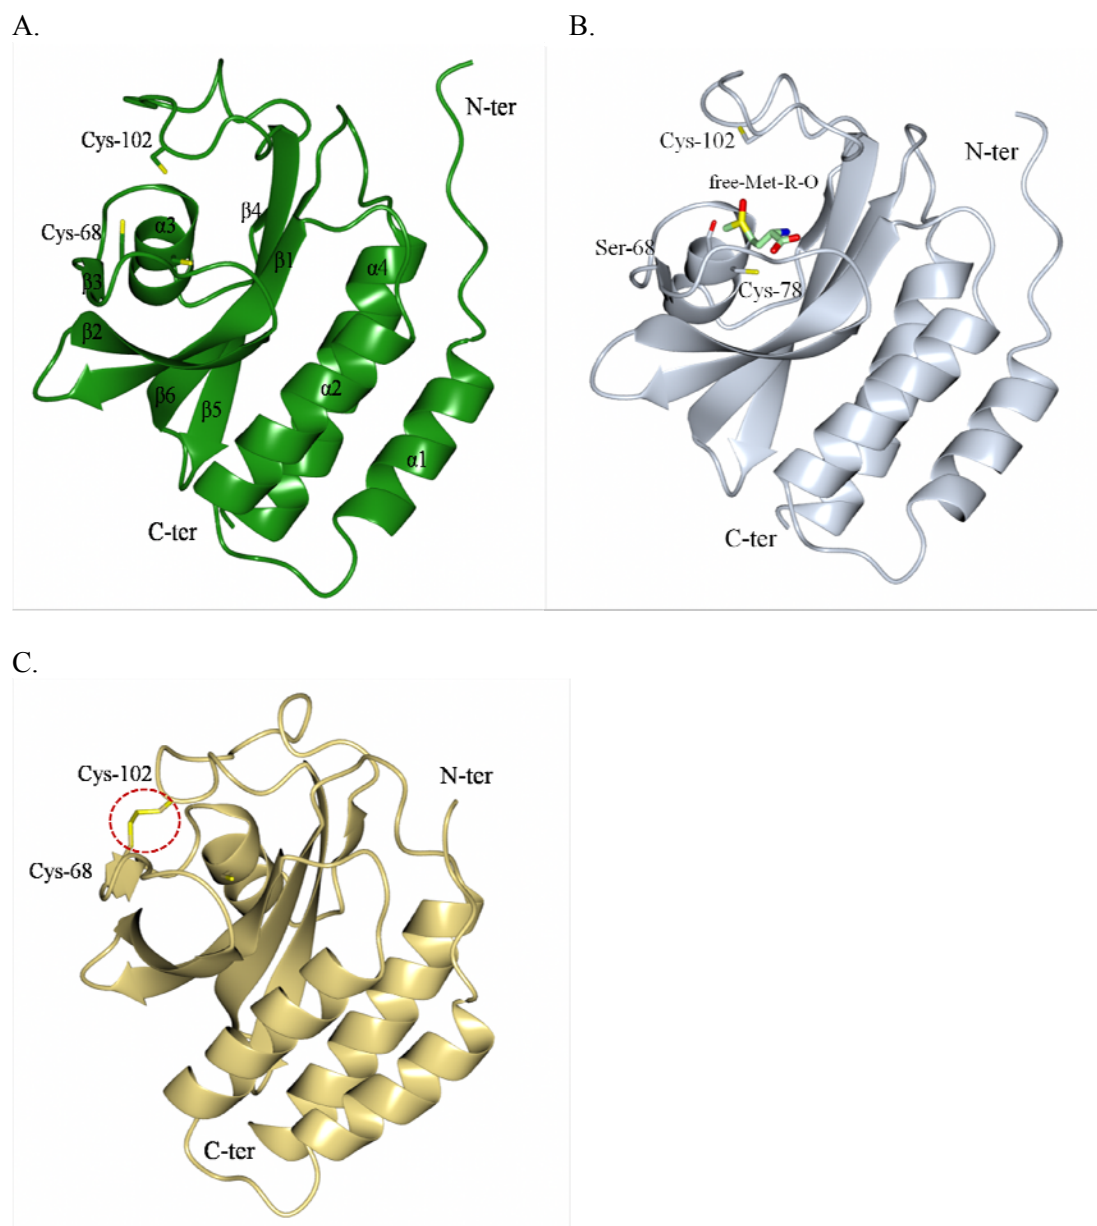

**Figure S2.** Structures of *S. aureus* fRMsrs. (A) Reduced form (fRMsr<sub>red</sub>). The overall structure of fRMsr<sub>red</sub> is composed of six antiparallel  $\beta$ -strands ( $\beta$ 1- $\beta$ 6) and four  $\alpha$ -helices ( $\alpha$ 1- $\alpha$ 4). (B) Substrate-bound form (fRMsr<sub>sub</sub>). The substrate free Met-R-O in C68S fRMsr is indicated by a green stick model. (C) Oxidized form (fRMsr<sub>ox</sub>). A disulfide bond formed by Cys-68 and Cys-102 is shown in red dotted circle.

**Figure S3**

**A**

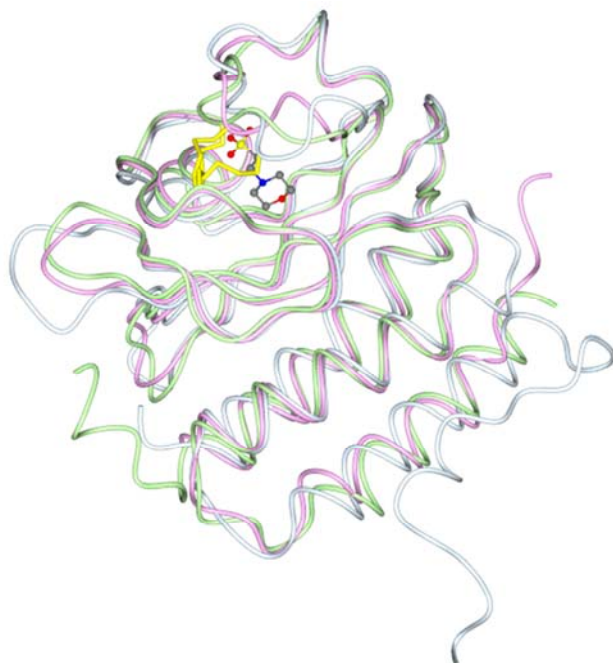

**B**

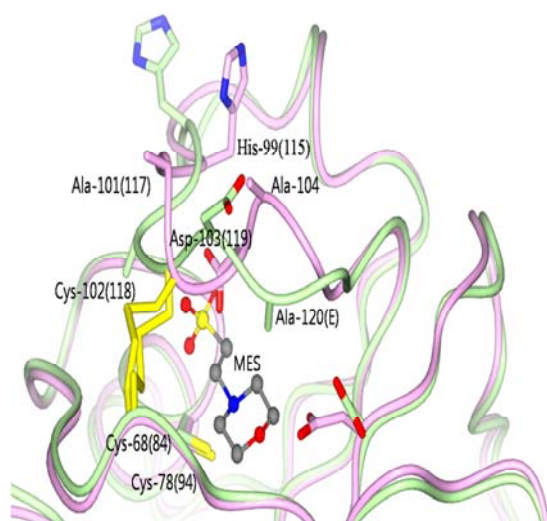

**C**

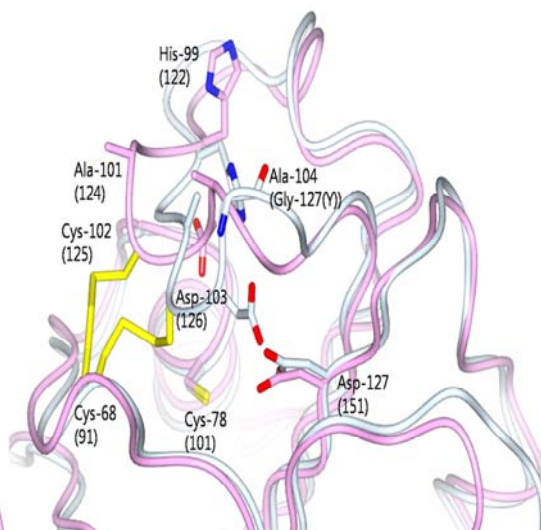

**Figure S3.** Structural comparison of oxidized *S. aureus* fRMsr with known fRMsr. (A) Comparison of overall structures. The backbone models for *S. aureus*, *E. coli*, and *S. cerevisiae* are shown in light purple, light green and light cyan, respectively. Disulfide bonds between Cys-68 and Cys-102 are represented by yellow sticks. MES in *E. coli* fRMsr is shown by a stick model. (B) Comparison of active sites between *S. aureus* (light purple) and *E. coli* (light green) fRMsr. Disulfide bonds are represented by yellow sticks and MES in *E. coli* fRMsr is shown by a stick model. Numbers in parenthesis represent the corresponding amino acid number of *E. coli* fRMsr. Ala-120 is from *E. coli*. (C) Comparison of active sites between *S. aureus* (light purple) and *S. cerevisiae* (light cyan) fRMsr. Disulfide bonds are represented by yellow sticks. Number in parenthesis represents the corresponding amino acid number of *S. cerevisiae* fRMsr. Gly-127 is from *S. cerevisiae*.
